# Supplementary material for: Exposure to Agent Orange and Hepatocellular Carcinoma Among US Military Personnel
Source: PubMed Central journal article supplement (PMC10696483; doi:10.1001/jamanetworkopen.2023.46380), 2023-12-04
Supplement: jamanetwopen-e2346380-s001.pdf [file jamanetwopen-e2346380-s001.pdf]

## Supplemental Online Content

Benhammou JN, Leng M, Shah, SC, et al. Exposure to Agent Orange and hepatocellular carcinoma among US military personnel. *JAMA Netw Open*. 2023;6(12):e2346380.  
doi:10.1001/jamanetworkopen.2023.46380

**eFigure.** Flow Diagram of Vietnam Veteran Cohort

**eTable 1.** List of *ICD-9* and *ICD-10* Codes Used for Etiologies of HCC and Medical Comorbidities

**eTable 2.** List of Laboratory LOINCs Including HIV, HCV, HBV, ALT, AST and Platelet Counts

**eTable 3.** *ICD-9* Codes of Gastrointestinal Malignant Neoplasms Other Than HCC

**eTable 4.** Association Between AO and Other Risk Factors for HCC Using APRI Score to Identify HCC Cases

**eMethods.** Additional Methods With eTables 5-8

**eTable 5.** Association Between AO and Other Risk Factors for HCC Using Inverse Probability Weighing

**eTable 6.** Age (In Years) Stratification for AO Exposure

**eTable 7.** Age (In Years) Stratification for Tobacco Use

**eTable 8.** Age (In Years) Stratification for Alcohol Use

This supplemental material has been provided by the authors to give readers additional information about their work.

**eFigure 1-** Flow diagram of final cohort

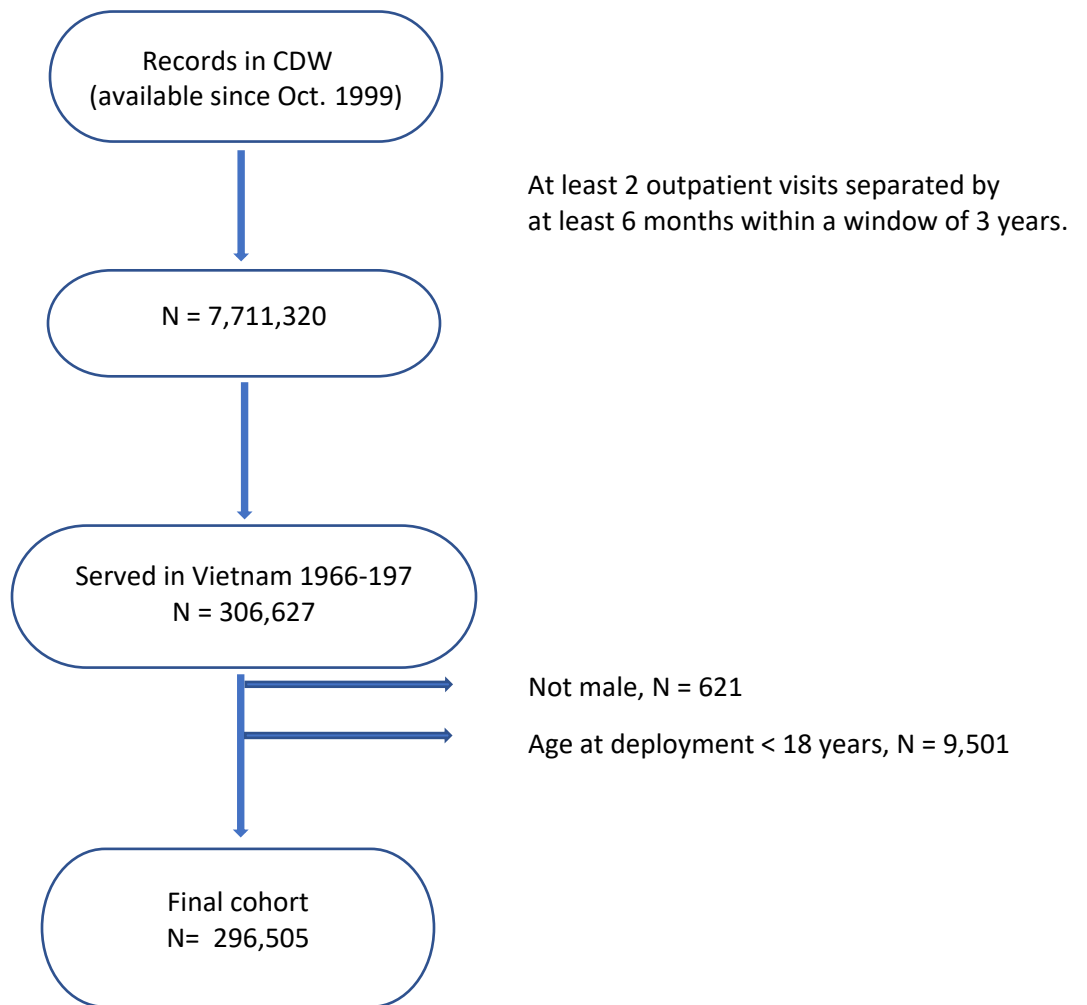

**eTable 1.** List of *ICD-9* and *ICD-10* Codes Used for Etiologies of HCC and Medical Comorbidities

**eTable 1a-** viral hepatitis ICD 9/10 codes

| <b>ICD 9/10</b> | <b>CONCEPT_NAME</b>                                                                                         |
|-----------------|-------------------------------------------------------------------------------------------------------------|
| 70              | Viral hepatitis                                                                                             |
| 70.1            | Viral hepatitis A without mention of hepatic coma                                                           |
| 70.2            | Viral hepatitis B with hepatic coma                                                                         |
| 70.2            | Viral hepatitis B with hepatic coma, acute or unspecified, without mention of hepatitis delta               |
| 70.21           | Viral hepatitis B with hepatic coma, acute or unspecified, with hepatitis delta                             |
| 70.22           | Chronic viral hepatitis B with hepatic coma without hepatitis delta                                         |
| 70.23           | Chronic viral hepatitis B with hepatic coma with hepatitis delta                                            |
| 70.3            | Viral hepatitis B without mention of hepatic coma                                                           |
| 70.3            | Viral hepatitis B without mention of hepatic coma, acute or unspecified, without mention of hepatitis delta |
| 70.31           | Viral hepatitis B without mention of hepatic coma, acute or unspecified, with hepatitis delta               |
| 70.32           | Chronic viral hepatitis B without mention of hepatic coma without mention of hepatitis delta                |
| 70.32           | Chronic viral hepatitis B without mention of hepatic coma without mention of hepatitis delta                |
| 70.33           | Chronic viral hepatitis B without mention of hepatic coma with hepatitis delta                              |
| 70.33           | Chronic viral hepatitis B without mention of hepatic coma with hepatitis delta                              |
| 70.4            | Other specified viral hepatitis with hepatic coma                                                           |
| 70.41           | Acute hepatitis C with hepatic coma                                                                         |
| 70.42           | Hepatitis delta without mention of active hepatitis B disease with hepatic coma                             |
| 70.42           | Hepatitis delta without mention of active hepatitis B disease with hepatic coma                             |
| 70.44           | Chronic hepatitis C with hepatic coma                                                                       |
| 70.49           | Other specified viral hepatitis with hepatic coma                                                           |
| 70.5            | Other specified viral hepatitis without mention of hepatic coma                                             |
| 70.51           | Acute hepatitis C without mention of hepatic coma                                                           |
| 70.52           | Hepatitis delta without mention of active hepatitis B disease or hepatic coma                               |
| 70.54           | Chronic hepatitis C without mention of hepatic coma                                                         |
| 70.59           | Other specified viral hepatitis without mention of hepatic coma                                             |
| 70.6            | Unspecified viral hepatitis with hepatic coma                                                               |
| 70.7            | Unspecified viral hepatitis C                                                                               |
| 70.7            | Unspecified viral hepatitis C without hepatic coma                                                          |
| 70.71           | Unspecified viral hepatitis C with hepatic coma                                                             |
| 70.9            | Unspecified viral hepatitis without mention of hepatic coma                                                 |
| B16             | Acute hepatitis B                                                                                           |
| B16.0           | Acute hepatitis B with delta-agent with hepatic coma                                                        |
| B16.1           | Acute hepatitis B with delta-agent without hepatic coma                                                     |
| B16.2           | Acute hepatitis B without delta-agent with hepatic coma                                                     |
| B16.9           | Acute hepatitis B without delta-agent and without hepatic coma                                              |
| B17             | Other acute viral hepatitis                                                                                 |
| B17.0           | Acute delta-(super) infection of hepatitis B carrier                                                        |
| B17.1           | Acute hepatitis C                                                                                           |
| B17.10          | Acute hepatitis C without hepatic coma                                                                      |
| B17.11          | Acute hepatitis C with hepatic coma                                                                         |
| B17.8           | Other specified acute viral hepatitis                                                                       |
| B17.9           | Acute viral hepatitis, unspecified                                                                          |
| B18             | Chronic viral hepatitis                                                                                     |

|        |                                                    |
|--------|----------------------------------------------------|
| B18.0  | Chronic viral hepatitis B with delta-agent         |
| B18.1  | Chronic viral hepatitis B without delta-agent      |
| B18.2  | Chronic viral hepatitis C                          |
| B18.8  | Other chronic viral hepatitis                      |
| B18.9  | Chronic viral hepatitis, unspecified               |
| B19    | Unspecified viral hepatitis                        |
| B19.0  | Unspecified viral hepatitis with hepatic coma      |
| B19.1  | Unspecified viral hepatitis B                      |
| B19.10 | Unspecified viral hepatitis B without hepatic coma |
| B19.11 | Unspecified viral hepatitis B with hepatic coma    |
| B19.2  | Unspecified viral hepatitis C                      |
| B19.20 | Unspecified viral hepatitis C without hepatic coma |
| B19.21 | Unspecified viral hepatitis C with hepatic coma    |
| B19.9  | Unspecified viral hepatitis without hepatic coma   |

**eTable 1b- ICD 9/10 codes for alcohol associated liver disease (ALD)**

| <b>ICD 9/10</b> | <b>CONCEPT_NAME</b>                                      |
|-----------------|----------------------------------------------------------|
| 291             | Alcohol-induced mental disorders                         |
| 291.0           | Alcohol withdrawal delirium                              |
| 291.1           | Alcohol-induced persisting amnestic disorder             |
| 291.2           | Alcohol-induced persisting dementia                      |
| 291.3           | Alcohol-induced psychotic disorder with hallucinations   |
| 291.4           | Idiosyncratic alcohol intoxication                       |
| 291.5           | Alcohol-induced psychotic disorder with delusions        |
| 291.8           | Other specified alcohol-induced mental disorders         |
| 291.81          | Alcohol withdrawal                                       |
| 291.82          | Alcohol induced sleep disorders                          |
| 291.89          | Other alcohol-induced mental disorders                   |
| 291.9           | Unspecified alcohol-induced mental disorders             |
| 303             | Alcohol dependence syndrome                              |
| 303.0           | Acute alcoholic intoxication                             |
| 303.00          | Acute alcoholic intoxication in alcoholism, unspecified  |
| 303.01          | Acute alcoholic intoxication in alcoholism, continuous   |
| 303.02          | Acute alcoholic intoxication in alcoholism, episodic     |
| 303.03          | Acute alcoholic intoxication in alcoholism, in remission |
| 303.9           | Other and unspecified alcohol dependence                 |
| 303.90          | Other and unspecified alcohol dependence, unspecified    |
| 303.91          | Other and unspecified alcohol dependence, continuous     |
| 303.92          | Other and unspecified alcohol dependence, episodic       |
| 303.93          | Other and unspecified alcohol dependence, in remission   |
| 305.0           | Alcohol abuse                                            |
| 305.00          | Alcohol abuse, unspecified                               |
| 305.01          | Alcohol abuse, continuous                                |
| 305.02          | Alcohol abuse, episodic                                  |
| 305.03          | Alcohol abuse, in remission                              |
| 357.5           | Alcoholic polyneuropathy                                 |

|         |                                                                           |
|---------|---------------------------------------------------------------------------|
| 425.5   | Alcoholic cardiomyopathy                                                  |
| 535.3   | Alcoholic gastritis                                                       |
| 535.3   | Alcoholic gastritis, without mention of hemorrhage                        |
| 535.31  | Alcoholic gastritis, with hemorrhage                                      |
| 571.0   | Alcoholic fatty liver                                                     |
| 571.1   | Acute alcoholic hepatitis                                                 |
| 571.2   | Alcoholic cirrhosis of liver                                              |
| 571.3   | Alcoholic liver damage, unspecified                                       |
| 790.3   | Excessive blood level of alcohol                                          |
| F10     | Alcohol related disorders                                                 |
| F10.1   | Alcohol abuse                                                             |
| F10.10  | Alcohol abuse, uncomplicated                                              |
| F10.11  | Alcohol abuse, in remission                                               |
| F10.12  | Alcohol abuse with intoxication                                           |
| F10.120 | Alcohol abuse with intoxication, uncomplicated                            |
| F10.121 | Alcohol abuse with intoxication delirium                                  |
| F10.129 | Alcohol abuse with intoxication, unspecified                              |
| F10.13  | Alcohol abuse, with withdrawal                                            |
| F10.130 | Alcohol abuse with withdrawal, uncomplicated                              |
| F10.131 | Alcohol abuse with withdrawal delirium                                    |
| F10.132 | Alcohol abuse with withdrawal with perceptual disturbance                 |
| F10.139 | Alcohol abuse with withdrawal, unspecified                                |
| F10.14  | Alcohol abuse with alcohol-induced mood disorder                          |
| F10.15  | Alcohol abuse with alcohol-induced psychotic disorder                     |
| F10.150 | Alcohol abuse with alcohol-induced psychotic disorder with delusions      |
| F10.151 | Alcohol abuse with alcohol-induced psychotic disorder with hallucinations |
| F10.159 | Alcohol abuse with alcohol-induced psychotic disorder, unspecified        |
| F10.18  | Alcohol abuse with other alcohol-induced disorders                        |
| F10.180 | Alcohol abuse with alcohol-induced anxiety disorder                       |
| F10.181 | Alcohol abuse with alcohol-induced sexual dysfunction                     |
| F10.182 | Alcohol abuse with alcohol-induced sleep disorder                         |
| F10.188 | Alcohol abuse with other alcohol-induced disorder                         |
| F10.19  | Alcohol abuse with unspecified alcohol-induced disorder                   |
| F10.2   | Alcohol dependence                                                        |
| F10.20  | Alcohol dependence, uncomplicated                                         |
| F10.21  | Alcohol dependence, in remission                                          |
| F10.22  | Alcohol dependence with intoxication                                      |
| F10.220 | Alcohol dependence with intoxication, uncomplicated                       |
| F10.221 | Alcohol dependence with intoxication delirium                             |
| F10.229 | Alcohol dependence with intoxication, unspecified                         |
| F10.23  | Alcohol dependence with withdrawal                                        |
| F10.230 | Alcohol dependence with withdrawal, uncomplicated                         |
| F10.231 | Alcohol dependence with withdrawal delirium                               |

|         |                                                                                      |
|---------|--------------------------------------------------------------------------------------|
| F10.232 | Alcohol dependence with withdrawal with perceptual disturbance                       |
| F10.239 | Alcohol dependence with withdrawal, unspecified                                      |
| F10.24  | Alcohol dependence with alcohol-induced mood disorder                                |
| F10.25  | Alcohol dependence with alcohol-induced psychotic disorder                           |
| F10.250 | Alcohol dependence with alcohol-induced psychotic disorder with delusions            |
| F10.251 | Alcohol dependence with alcohol-induced psychotic disorder with hallucinations       |
| F10.259 | Alcohol dependence with alcohol-induced psychotic disorder, unspecified              |
| F10.26  | Alcohol dependence with alcohol-induced persisting amnestic disorder                 |
| F10.27  | Alcohol dependence with alcohol-induced persisting dementia                          |
| F10.28  | Alcohol dependence with other alcohol-induced disorders                              |
| F10.280 | Alcohol dependence with alcohol-induced anxiety disorder                             |
| F10.281 | Alcohol dependence with alcohol-induced sexual dysfunction                           |
| F10.282 | Alcohol dependence with alcohol-induced sleep disorder                               |
| F10.288 | Alcohol dependence with other alcohol-induced disorder                               |
| F10.29  | Alcohol dependence with unspecified alcohol-induced disorder                         |
| F10.9   | Alcohol use, unspecified                                                             |
| F10.92  | Alcohol use, unspecified with intoxication                                           |
| F10.920 | Alcohol use, unspecified with intoxication, uncomplicated                            |
| F10.921 | Alcohol use, unspecified with intoxication delirium                                  |
| F10.929 | Alcohol use, unspecified with intoxication, unspecified                              |
| F10.93  | Alcohol use, unspecified with withdrawal                                             |
| F10.930 | Alcohol use, unspecified with withdrawal, uncomplicated                              |
| F10.931 | Alcohol use, unspecified with withdrawal delirium                                    |
| F10.932 | Alcohol use, unspecified with withdrawal with perceptual disturbance                 |
| F10.939 | Alcohol use, unspecified with withdrawal, unspecified                                |
| F10.94  | Alcohol use, unspecified with alcohol-induced mood disorder                          |
| F10.95  | Alcohol use, unspecified with alcohol-induced psychotic disorder                     |
| F10.950 | Alcohol use, unspecified with alcohol-induced psychotic disorder with delusions      |
| F10.951 | Alcohol use, unspecified with alcohol-induced psychotic disorder with hallucinations |
| F10.959 | Alcohol use, unspecified with alcohol-induced psychotic disorder, unspecified        |
| F10.96  | Alcohol use, unspecified with alcohol-induced persisting amnestic disorder           |
| F10.97  | Alcohol use, unspecified with alcohol-induced persisting dementia                    |
| F10.98  | Alcohol use, unspecified with other alcohol-induced disorders                        |
| F10.980 | Alcohol use, unspecified with alcohol-induced anxiety disorder                       |
| F10.981 | Alcohol use, unspecified with alcohol-induced sexual dysfunction                     |
| F10.982 | Alcohol use, unspecified with alcohol-induced sleep disorder                         |

|         |                                                                    |
|---------|--------------------------------------------------------------------|
| F10.988 | Alcohol use, unspecified with other alcohol-induced disorder       |
| F10.99  | Alcohol use, unspecified with unspecified alcohol-induced disorder |
| G31.2   | Degeneration of nervous system due to alcohol                      |
| G62.1   | Alcoholic polyneuropathy                                           |
| G72.1   | Alcoholic myopathy                                                 |
| I42.6   | Alcoholic cardiomyopathy                                           |
| K29.2   | Alcoholic gastritis                                                |
| K29.20  | Alcoholic gastritis without bleeding                               |
| K29.21  | Alcoholic gastritis with bleeding                                  |
| K70     | Alcoholic liver disease                                            |
| K70.0   | Alcoholic fatty liver                                              |
| K70.1   | Alcoholic hepatitis                                                |
| K70.10  | Alcoholic hepatitis without ascites                                |
| K70.11  | Alcoholic hepatitis with ascites                                   |
| K70.2   | Alcoholic fibrosis and sclerosis of liver                          |
| K70.3   | Alcoholic cirrhosis of liver                                       |
| K70.30  | Alcoholic cirrhosis of liver without ascites                       |
| K70.31  | Alcoholic cirrhosis of liver with ascites                          |
| K70.4   | Alcoholic hepatic failure                                          |
| K70.40  | Alcoholic hepatic failure without coma                             |
| K70.41  | Alcoholic hepatic failure with coma                                |
| K70.9   | Alcoholic liver disease, unspecified                               |
| Z71.4   | Alcohol abuse counseling and surveillance                          |
| Z71.41  | Alcohol abuse counseling and surveillance of alcoholic             |

**eTable 1c- Nonalcoholic fatty liver disease (NAFLD) and nonalcoholic steatohepatitis (NASH) ICD 9/10 codes.**

| ICD 9/10 | CONCEPT_NAME                                |
|----------|---------------------------------------------|
| 571.8    | chronic nonalcoholic steatohepatitis        |
| 571.9    | unspecified chronic liver disease           |
| 573.8    | liver disorders                             |
| 573.9    | unspecified disorder of liver               |
| K75.8    | other specified inflammatory liver diseases |
| 571.8    | chronic nonalcoholic liver disease          |
| K76.0    | fatty (change of) liver                     |

**eTable 1d- Hemochromatosis ICD 9/10 codes**

| ICD 9/10 | CONCEPT_NAME                    |
|----------|---------------------------------|
| 275      | Disorders of mineral metabolism |
| E83.1    | Disorders of iron metabolism    |

**eTable 1e- autoimmune liver disease ICD 9/10 codes**

| ICD 9/10 | CONCEPT_NAME      |
|----------|-------------------|
| 571.6    | Biliary cirrhosis |

|        |                                |
|--------|--------------------------------|
| 576.1  | Cholangitis                    |
| K74.3  | Primary biliary cirrhosis      |
| K75.4  | Autoimmune hepatitis           |
| K83.0  | Cholangitis                    |
| K83.01 | Primary sclerosing cholangitis |
| K83.09 | Other cholangitis              |

**eTable 1f- ICD 9/10 codes for other liver diseases**

| ICD9/10 | CONCEPT_NAME                              |
|---------|-------------------------------------------|
| 572.8   | Liver disease sequelae                    |
| 576.8   | Biliary cyst                              |
| 277.09  | Cystic fibrosis and othe manifestations   |
| K76.89  | Other specified diseases of the liver     |
| K83.8   | Other specified diseases of biliary tract |
| E84.8   | Cystic fibrosis and othe manifestations   |
| K74.0   | Hepatic fibrosis                          |

**eTable 1g- Alpha-1-anti trypsin ICD 9/10 codes**

| ICD 9/10 | CONCEPT_NAME                                                           |
|----------|------------------------------------------------------------------------|
| 277.6    | Other deficiencies of circulating enzymes                              |
| E88.0    | Disorders of plasma-protein metabolism, not elsewhere classified       |
| E88.02   | Plasminogen deficiency                                                 |
| E88.01   | Alpha-1-antitrypsin deficiency                                         |
| E88.09   | Other disorders of plasma-protein metabolism, not elsewhere classified |

**eTable 1h- Diabetes ICD 9/10 codes**

| ICD 9/10 | CONCEPT_NAME                                                                                                                  |
|----------|-------------------------------------------------------------------------------------------------------------------------------|
| E08.0    | Diabetes mellitus due to underlying condition with hyperosmolarity                                                            |
| E08.00   | Diabetes mellitus due to underlying condition with hyperosmolarity without nonketotic hyperglycemic-hyperosmolar coma (NKHHC) |
| E08.01   | Diabetes mellitus due to underlying condition with hyperosmolarity with coma                                                  |
| E08.1    | Diabetes mellitus due to underlying condition with ketoacidosis                                                               |
| E08.10   | Diabetes mellitus due to underlying condition with ketoacidosis without coma                                                  |
| E08.11   | Diabetes mellitus due to underlying condition with ketoacidosis with coma                                                     |
| E08.2    | Diabetes mellitus due to underlying condition with kidney complications                                                       |
| E08.21   | Diabetes mellitus due to underlying condition with diabetic nephropathy                                                       |
| E08.22   | Diabetes mellitus due to underlying condition with diabetic chronic kidney disease                                            |
| E08.29   | Diabetes mellitus due to underlying condition with other diabetic kidney complication                                         |
| E08.3    | Diabetes mellitus due to underlying condition with ophthalmic complications                                                   |
| E08.31   | Diabetes mellitus due to underlying condition with unspecified diabetic retinopathy                                           |
| E08.311  | Diabetes mellitus due to underlying condition with unspecified diabetic retinopathy with macular edema                        |
| E08.319  | Diabetes mellitus due to underlying condition with unspecified diabetic retinopathy without macular edema                     |
| E08.32   | Diabetes mellitus due to underlying condition with mild nonproliferative diabetic retinopathy                                 |



- E08.321 Diabetes mellitus due to underlying condition with mild nonproliferative diabetic retinopathy with macular edema
- E08.321 1 Diabetes mellitus due to underlying condition with mild nonproliferative diabetic retinopathy with macular edema, right eye
- E08.321 2 Diabetes mellitus due to underlying condition with mild nonproliferative diabetic retinopathy with macular edema, left eye
- E08.321 3 Diabetes mellitus due to underlying condition with mild nonproliferative diabetic retinopathy with macular edema, bilateral
- E08.321 9 Diabetes mellitus due to underlying condition with mild nonproliferative diabetic retinopathy with macular edema, unspecified eye
- E08.329 Diabetes mellitus due to underlying condition with mild nonproliferative diabetic retinopathy without macular edema
- E08.329 1 Diabetes mellitus due to underlying condition with mild nonproliferative diabetic retinopathy without macular edema, right eye
- E08.329 2 Diabetes mellitus due to underlying condition with mild nonproliferative diabetic retinopathy without macular edema, left eye
- E08.329 3 Diabetes mellitus due to underlying condition with mild nonproliferative diabetic retinopathy without macular edema, bilateral
- E08.329 9 Diabetes mellitus due to underlying condition with mild nonproliferative diabetic retinopathy without macular edema, unspecified eye
- E08.33 Diabetes mellitus due to underlying condition with moderate nonproliferative diabetic retinopathy
- E08.331 Diabetes mellitus due to underlying condition with moderate nonproliferative diabetic retinopathy with macular edema
- E08.331 1 Diabetes mellitus due to underlying condition with moderate nonproliferative diabetic retinopathy with macular edema, right eye
- E08.331 2 Diabetes mellitus due to underlying condition with moderate nonproliferative diabetic retinopathy with macular edema, left eye
- E08.331 3 Diabetes mellitus due to underlying condition with moderate nonproliferative diabetic retinopathy with macular edema, bilateral
- E08.331 9 Diabetes mellitus due to underlying condition with moderate nonproliferative diabetic retinopathy with macular edema, unspecified eye
- E08.339 Diabetes mellitus due to underlying condition with moderate nonproliferative diabetic retinopathy without macular edema
- E08.339 1 Diabetes mellitus due to underlying condition with moderate nonproliferative diabetic retinopathy without macular edema, right eye
- E08.339 2 Diabetes mellitus due to underlying condition with moderate nonproliferative diabetic retinopathy without macular edema, left eye
- E08.339 3 Diabetes mellitus due to underlying condition with moderate nonproliferative diabetic retinopathy without macular edema, bilateral
- E08.339 9 Diabetes mellitus due to underlying condition with moderate nonproliferative diabetic retinopathy without macular edema, unspecified eye
- E08.34 Diabetes mellitus due to underlying condition with severe nonproliferative diabetic retinopathy
- E08.341 Diabetes mellitus due to underlying condition with severe nonproliferative diabetic retinopathy with macular edema
- E08.341 1 Diabetes mellitus due to underlying condition with severe nonproliferative diabetic retinopathy with macular edema, right eye
- E08.341 2 Diabetes mellitus due to underlying condition with severe nonproliferative diabetic retinopathy with macular edema, left eye
- E08.341 3 Diabetes mellitus due to underlying condition with severe nonproliferative diabetic retinopathy with macular edema, bilateral
- E08.341 9 Diabetes mellitus due to underlying condition with severe nonproliferative diabetic retinopathy with macular edema, unspecified eye

- E08.349 Diabetes mellitus due to underlying condition with severe nonproliferative diabetic retinopathy without macular edema
- E08.349 1 Diabetes mellitus due to underlying condition with severe nonproliferative diabetic retinopathy without macular edema, right eye
- E08.349 2 Diabetes mellitus due to underlying condition with severe nonproliferative diabetic retinopathy without macular edema, left eye
- E08.349 3 Diabetes mellitus due to underlying condition with severe nonproliferative diabetic retinopathy without macular edema, bilateral
- E08.349 9 Diabetes mellitus due to underlying condition with severe nonproliferative diabetic retinopathy without macular edema, unspecified eye
- E08.35 Diabetes mellitus due to underlying condition with proliferative diabetic retinopathy
- E08.351 Diabetes mellitus due to underlying condition with proliferative diabetic retinopathy with macular edema
- E08.351 1 Diabetes mellitus due to underlying condition with proliferative diabetic retinopathy with macular edema, right eye
- E08.351 2 Diabetes mellitus due to underlying condition with proliferative diabetic retinopathy with macular edema, left eye
- E08.351 3 Diabetes mellitus due to underlying condition with proliferative diabetic retinopathy with macular edema, bilateral
- E08.351 9 Diabetes mellitus due to underlying condition with proliferative diabetic retinopathy with macular edema, unspecified eye
- E08.352 Diabetes mellitus due to underlying condition with proliferative diabetic retinopathy with traction retinal detachment involving the macula
- E08.352 1 Diabetes mellitus due to underlying condition with proliferative diabetic retinopathy with traction retinal detachment involving the macula, right eye
- E08.352 2 Diabetes mellitus due to underlying condition with proliferative diabetic retinopathy with traction retinal detachment involving the macula, left eye
- E08.352 3 Diabetes mellitus due to underlying condition with proliferative diabetic retinopathy with traction retinal detachment involving the macula, bilateral
- E08.352 9 Diabetes mellitus due to underlying condition with proliferative diabetic retinopathy with traction retinal detachment involving the macula, unspecified eye
- E08.353 Diabetes mellitus due to underlying condition with proliferative diabetic retinopathy with traction retinal detachment not involving the macula
- E08.353 1 Diabetes mellitus due to underlying condition with proliferative diabetic retinopathy with traction retinal detachment not involving the macula, right eye
- E08.353 2 Diabetes mellitus due to underlying condition with proliferative diabetic retinopathy with traction retinal detachment not involving the macula, left eye
- E08.353 3 Diabetes mellitus due to underlying condition with proliferative diabetic retinopathy with traction retinal detachment not involving the macula, bilateral
- E08.353 9 Diabetes mellitus due to underlying condition with proliferative diabetic retinopathy with traction retinal detachment not involving the macula, unspecified eye
- E08.354 Diabetes mellitus due to underlying condition with proliferative diabetic retinopathy with combined traction retinal detachment and rhegmatogenous retinal detachment
- E08.354 1 Diabetes mellitus due to underlying condition with proliferative diabetic retinopathy with combined traction retinal detachment and rhegmatogenous retinal detachment, right eye
- E08.354 2 Diabetes mellitus due to underlying condition with proliferative diabetic retinopathy with combined traction retinal detachment and rhegmatogenous retinal detachment, left eye
- E08.354 3 Diabetes mellitus due to underlying condition with proliferative diabetic retinopathy with combined traction retinal detachment and rhegmatogenous retinal detachment, bilateral
- E08.354 9 Diabetes mellitus due to underlying condition with proliferative diabetic retinopathy with combined traction retinal detachment and rhegmatogenous retinal detachment, unspecified eye
- E08.355 Diabetes mellitus due to underlying condition with stable proliferative diabetic retinopathy

E08.355  
1 Diabetes mellitus due to underlying condition with stable proliferative diabetic retinopathy, right eye

E08.355  
2 Diabetes mellitus due to underlying condition with stable proliferative diabetic retinopathy, left eye

E08.355  
3 Diabetes mellitus due to underlying condition with stable proliferative diabetic retinopathy, bilateral

E08.355  
9 Diabetes mellitus due to underlying condition with stable proliferative diabetic retinopathy, unspecified eye

E08.359  
1 Diabetes mellitus due to underlying condition with proliferative diabetic retinopathy without macular edema, right eye

E08.359  
2 Diabetes mellitus due to underlying condition with proliferative diabetic retinopathy without macular edema, left eye

E08.359  
3 Diabetes mellitus due to underlying condition with proliferative diabetic retinopathy without macular edema, bilateral

E08.359  
9 Diabetes mellitus due to underlying condition with proliferative diabetic retinopathy without macular edema, unspecified eye

E08.36 Diabetes mellitus due to underlying condition with diabetic cataract

E08.37 Diabetes mellitus due to underlying condition with diabetic macular edema, resolved following treatment

E08.37X  
1 Diabetes mellitus due to underlying condition with diabetic macular edema, resolved following treatment, right eye

E08.37X  
2 Diabetes mellitus due to underlying condition with diabetic macular edema, resolved following treatment, left eye

E08.37X  
3 Diabetes mellitus due to underlying condition with diabetic macular edema, resolved following treatment, bilateral

E08.37X  
9 Diabetes mellitus due to underlying condition with diabetic macular edema, resolved following treatment, unspecified eye

E08.39 Diabetes mellitus due to underlying condition with other diabetic ophthalmic complication

E08.4 Diabetes mellitus due to underlying condition with neurological complications

E08.40 Diabetes mellitus due to underlying condition with diabetic neuropathy, unspecified

E08.41 Diabetes mellitus due to underlying condition with diabetic mononeuropathy

E08.42 Diabetes mellitus due to underlying condition with diabetic polyneuropathy

E08.43 Diabetes mellitus due to underlying condition with diabetic autonomic (poly)neuropathy

E08.44 Diabetes mellitus due to underlying condition with diabetic amyotrophy

E08.49 Diabetes mellitus due to underlying condition with other diabetic neurological complication

E08.5 Diabetes mellitus due to underlying condition with circulatory complications

E08.51 Diabetes mellitus due to underlying condition with diabetic peripheral angiopathy without gangrene

E08.52 Diabetes mellitus due to underlying condition with diabetic peripheral angiopathy with gangrene

E08.59 Diabetes mellitus due to underlying condition with other circulatory complications

E08.6 Diabetes mellitus due to underlying condition with other specified complications

E08.61 Diabetes mellitus due to underlying condition with diabetic arthropathy

E08.610 Diabetes mellitus due to underlying condition with diabetic neuropathic arthropathy

E08.618 Diabetes mellitus due to underlying condition with other diabetic arthropathy

E08.62 Diabetes mellitus due to underlying condition with skin complications

E08.620 Diabetes mellitus due to underlying condition with diabetic dermatitis

E08.621 Diabetes mellitus due to underlying condition with foot ulcer

E08.622 Diabetes mellitus due to underlying condition with other skin ulcer

E08.628 Diabetes mellitus due to underlying condition with other skin complications

- E08.63 Diabetes mellitus due to underlying condition with oral complications
- E08.630 Diabetes mellitus due to underlying condition with periodontal disease
- E08.638 Diabetes mellitus due to underlying condition with other oral complications
- E08.64 Diabetes mellitus due to underlying condition with hypoglycemia
- E08.640 Diabetes mellitus due to underlying condition with hypoglycemia without coma
- E08.641 Diabetes mellitus due to underlying condition with hypoglycemia with coma
- E08.649 Diabetes mellitus due to underlying condition with hypoglycemia without coma
- E08.65 Diabetes mellitus due to underlying condition with hyperglycemia
- E08.69 Diabetes mellitus due to underlying condition with other specified complication
- E08.8 Diabetes mellitus due to underlying condition with unspecified complications
- E08.9 Diabetes mellitus due to underlying condition without complications
- E09.0 Drug or chemical induced diabetes mellitus with hyperosmolarity
- E09.00 Drug or chemical induced diabetes mellitus with hyperosmolarity without nonketotic hyperglycemic-hyperosmolar coma (NKHHC)
- E09.01 Drug or chemical induced diabetes mellitus with hyperosmolarity with coma
- E09.1 Drug or chemical induced diabetes mellitus with ketoacidosis
- E09.10 Drug or chemical induced diabetes mellitus with ketoacidosis without coma
- E09.11 Drug or chemical induced diabetes mellitus with ketoacidosis with coma
- E09.2 Drug or chemical induced diabetes mellitus with kidney complications
- E09.21 Drug or chemical induced diabetes mellitus with diabetic nephropathy
- E09.22 Drug or chemical induced diabetes mellitus with diabetic chronic kidney disease
- E09.29 Drug or chemical induced diabetes mellitus with other diabetic kidney complication
- E09.3 Drug or chemical induced diabetes mellitus with ophthalmic complications
- E09.31 Drug or chemical induced diabetes mellitus with unspecified diabetic retinopathy
- E09.311 Drug or chemical induced diabetes mellitus with unspecified diabetic retinopathy with macular edema
- E09.319 Drug or chemical induced diabetes mellitus with unspecified diabetic retinopathy without macular edema
- E09.32 Drug or chemical induced diabetes mellitus with mild nonproliferative diabetic retinopathy
- E09.321 Drug or chemical induced diabetes mellitus with mild nonproliferative diabetic retinopathy with macular edema
- E09.321 1 Drug or chemical induced diabetes mellitus with mild nonproliferative diabetic retinopathy with macular edema, right eye
- E09.321 2 Drug or chemical induced diabetes mellitus with mild nonproliferative diabetic retinopathy with macular edema, left eye
- E09.321 3 Drug or chemical induced diabetes mellitus with mild nonproliferative diabetic retinopathy with macular edema, bilateral
- E09.321 9 Drug or chemical induced diabetes mellitus with mild nonproliferative diabetic retinopathy with macular edema, unspecified eye
- E09.329 Drug or chemical induced diabetes mellitus with mild nonproliferative diabetic retinopathy without macular edema
- E09.329 1 Drug or chemical induced diabetes mellitus with mild nonproliferative diabetic retinopathy without macular edema, right eye
- E09.329 2 Drug or chemical induced diabetes mellitus with mild nonproliferative diabetic retinopathy without macular edema, left eye
- E09.329 3 Drug or chemical induced diabetes mellitus with mild nonproliferative diabetic retinopathy without macular edema, bilateral
- E09.329 9 Drug or chemical induced diabetes mellitus with mild nonproliferative diabetic retinopathy without macular edema, unspecified eye
- E09.33 Drug or chemical induced diabetes mellitus with moderate nonproliferative diabetic retinopathy

E09.331 Drug or chemical induced diabetes mellitus with moderate nonproliferative diabetic retinopathy with macular edema

E09.331 1 Drug or chemical induced diabetes mellitus with moderate nonproliferative diabetic retinopathy with macular edema, right eye

E09.331 2 Drug or chemical induced diabetes mellitus with moderate nonproliferative diabetic retinopathy with macular edema, left eye

E09.331 3 Drug or chemical induced diabetes mellitus with moderate nonproliferative diabetic retinopathy with macular edema, bilateral

E09.331 9 Drug or chemical induced diabetes mellitus with moderate nonproliferative diabetic retinopathy with macular edema, unspecified eye

E09.339 Drug or chemical induced diabetes mellitus with moderate nonproliferative diabetic retinopathy without macular edema

E09.339 1 Drug or chemical induced diabetes mellitus with moderate nonproliferative diabetic retinopathy without macular edema, right eye

E09.339 2 Drug or chemical induced diabetes mellitus with moderate nonproliferative diabetic retinopathy without macular edema, left eye

E09.339 3 Drug or chemical induced diabetes mellitus with moderate nonproliferative diabetic retinopathy without macular edema, bilateral

E09.339 9 Drug or chemical induced diabetes mellitus with moderate nonproliferative diabetic retinopathy without macular edema, unspecified eye

E09.34 Drug or chemical induced diabetes mellitus with severe nonproliferative diabetic retinopathy

E09.341 Drug or chemical induced diabetes mellitus with severe nonproliferative diabetic retinopathy with macular edema

E09.341 1 Drug or chemical induced diabetes mellitus with severe nonproliferative diabetic retinopathy with macular edema, right eye

E09.341 2 Drug or chemical induced diabetes mellitus with severe nonproliferative diabetic retinopathy with macular edema, left eye

E09.341 3 Drug or chemical induced diabetes mellitus with severe nonproliferative diabetic retinopathy with macular edema, bilateral

E09.341 9 Drug or chemical induced diabetes mellitus with severe nonproliferative diabetic retinopathy with macular edema, unspecified eye

E09.349 Drug or chemical induced diabetes mellitus with severe nonproliferative diabetic retinopathy without macular edema

E09.349 1 Drug or chemical induced diabetes mellitus with severe nonproliferative diabetic retinopathy without macular edema, right eye

E09.349 2 Drug or chemical induced diabetes mellitus with severe nonproliferative diabetic retinopathy without macular edema, left eye

E09.349 3 Drug or chemical induced diabetes mellitus with severe nonproliferative diabetic retinopathy without macular edema, bilateral

E09.349 9 Drug or chemical induced diabetes mellitus with severe nonproliferative diabetic retinopathy without macular edema, unspecified eye

E09.35 Drug or chemical induced diabetes mellitus with proliferative diabetic retinopathy

E09.351 Drug or chemical induced diabetes mellitus with proliferative diabetic retinopathy with macular edema

E09.351 1 Drug or chemical induced diabetes mellitus with proliferative diabetic retinopathy with macular edema, right eye

E09.351 2 Drug or chemical induced diabetes mellitus with proliferative diabetic retinopathy with macular edema, left eye

E09.351 3 Drug or chemical induced diabetes mellitus with proliferative diabetic retinopathy with macular edema, bilateral

E09.351 9 Drug or chemical induced diabetes mellitus with proliferative diabetic retinopathy with macular edema, unspecified eye

E09.352 Drug or chemical induced diabetes mellitus with proliferative diabetic retinopathy with traction retinal detachment involving the macula

E09.352 1 Drug or chemical induced diabetes mellitus with proliferative diabetic retinopathy with traction retinal detachment involving the macula, right eye

E09.352 2 Drug or chemical induced diabetes mellitus with proliferative diabetic retinopathy with traction retinal detachment involving the macula, left eye

E09.352 3 Drug or chemical induced diabetes mellitus with proliferative diabetic retinopathy with traction retinal detachment involving the macula, bilateral

E09.352 9 Drug or chemical induced diabetes mellitus with proliferative diabetic retinopathy with traction retinal detachment involving the macula, unspecified eye

E09.353 Drug or chemical induced diabetes mellitus with proliferative diabetic retinopathy with traction retinal detachment not involving the macula

E09.353 1 Drug or chemical induced diabetes mellitus with proliferative diabetic retinopathy with traction retinal detachment not involving the macula, right eye

E09.353 2 Drug or chemical induced diabetes mellitus with proliferative diabetic retinopathy with traction retinal detachment not involving the macula, left eye

E09.353 3 Drug or chemical induced diabetes mellitus with proliferative diabetic retinopathy with traction retinal detachment not involving the macula, bilateral

E09.353 9 Drug or chemical induced diabetes mellitus with proliferative diabetic retinopathy with traction retinal detachment not involving the macula, unspecified eye

E09.354 Drug or chemical induced diabetes mellitus with proliferative diabetic retinopathy with combined traction retinal detachment and rhegmatogenous retinal detachment

E09.354 1 Drug or chemical induced diabetes mellitus with proliferative diabetic retinopathy with combined traction retinal detachment and rhegmatogenous retinal detachment, right eye

E09.354 2 Drug or chemical induced diabetes mellitus with proliferative diabetic retinopathy with combined traction retinal detachment and rhegmatogenous retinal detachment, left eye

E09.354 3 Drug or chemical induced diabetes mellitus with proliferative diabetic retinopathy with combined traction retinal detachment and rhegmatogenous retinal detachment, bilateral

E09.354 9 Drug or chemical induced diabetes mellitus with proliferative diabetic retinopathy with combined traction retinal detachment and rhegmatogenous retinal detachment, unspecified eye

E09.355 Drug or chemical induced diabetes mellitus with stable proliferative diabetic retinopathy

E09.355 1 Drug or chemical induced diabetes mellitus with stable proliferative diabetic retinopathy, right eye

E09.355 2 Drug or chemical induced diabetes mellitus with stable proliferative diabetic retinopathy, left eye

E09.355 3 Drug or chemical induced diabetes mellitus with stable proliferative diabetic retinopathy, bilateral

E09.355 9 Drug or chemical induced diabetes mellitus with stable proliferative diabetic retinopathy, unspecified eye

E09.359 Drug or chemical induced diabetes mellitus with proliferative diabetic retinopathy without macular edema

E09.359 1 Drug or chemical induced diabetes mellitus with proliferative diabetic retinopathy without macular edema, right eye

E09.359 2 Drug or chemical induced diabetes mellitus with proliferative diabetic retinopathy without macular edema, left eye

E09.359 3 Drug or chemical induced diabetes mellitus with proliferative diabetic retinopathy without macular edema, bilateral

E09.359 9 Drug or chemical induced diabetes mellitus with proliferative diabetic retinopathy without macular edema, unspecified eye

E09.36 Drug or chemical induced diabetes mellitus with diabetic cataract

E09.37 Drug or chemical induced diabetes mellitus with diabetic macular edema, resolved following treatment

E09.37X 1 Drug or chemical induced diabetes mellitus with diabetic macular edema, resolved following treatment, right eye

- E09.37X 2 Drug or chemical induced diabetes mellitus with diabetic macular edema, resolved following treatment, left eye
- E09.37X 3 Drug or chemical induced diabetes mellitus with diabetic macular edema, resolved following treatment, bilateral
- E09.37X 9 Drug or chemical induced diabetes mellitus with diabetic macular edema, resolved following treatment, unspecified eye
- E09.39 Drug or chemical induced diabetes mellitus with other diabetic ophthalmic complication
- E09.4 Drug or chemical induced diabetes mellitus with neurological complications
- E09.40 Drug or chemical induced diabetes mellitus with neurological complications with diabetic neuropathy, unspecified
- E09.41 Drug or chemical induced diabetes mellitus with neurological complications with diabetic mononeuropathy
- E09.42 Drug or chemical induced diabetes mellitus with neurological complications with diabetic polyneuropathy
- E09.43 Drug or chemical induced diabetes mellitus with neurological complications with diabetic autonomic (poly)neuropathy
- E09.44 Drug or chemical induced diabetes mellitus with neurological complications with diabetic amyotrophy
- E09.49 Drug or chemical induced diabetes mellitus with neurological complications with other diabetic neurological complication
- E09.5 Drug or chemical induced diabetes mellitus with circulatory complications
- E09.51 Drug or chemical induced diabetes mellitus with diabetic peripheral angiopathy without gangrene
- E09.52 Drug or chemical induced diabetes mellitus with diabetic peripheral angiopathy with gangrene
- E09.59 Drug or chemical induced diabetes mellitus with other circulatory complications
- E09.6 Drug or chemical induced diabetes mellitus with other specified complications
- E09.61 Drug or chemical induced diabetes mellitus with diabetic arthropathy
- E09.610 Drug or chemical induced diabetes mellitus with diabetic neuropathic arthropathy
- E09.618 Drug or chemical induced diabetes mellitus with other diabetic arthropathy
- E09.62 Drug or chemical induced diabetes mellitus with skin complications
- E09.620 Drug or chemical induced diabetes mellitus with diabetic dermatitis
- E09.621 Drug or chemical induced diabetes mellitus with foot ulcer
- E09.622 Drug or chemical induced diabetes mellitus with other skin ulcer
- E09.628 Drug or chemical induced diabetes mellitus with other skin complications
- E09.63 Drug or chemical induced diabetes mellitus with oral complications
- E09.630 Drug or chemical induced diabetes mellitus with periodontal disease
- E09.638 Drug or chemical induced diabetes mellitus with other oral complications
- E09.65 Drug or chemical induced diabetes mellitus with hyperglycemia
- E09.69 Drug or chemical induced diabetes mellitus with other specified complication
- E09.8 Drug or chemical induced diabetes mellitus with unspecified complications
- E09.9 Drug or chemical induced diabetes mellitus without complications
- E11 Type 2 diabetes mellitus
- E11.0 Type 2 diabetes mellitus with hyperosmolarity
- E11.00 Type 2 diabetes mellitus with hyperosmolarity without nonketotic hyperglycemic-hyperosmolar coma (NKHHC)
- E11.01 Type 2 diabetes mellitus with hyperosmolarity with coma
- E11.1 Type 2 diabetes mellitus with ketoacidosis
- E11.10 Type 2 diabetes mellitus with ketoacidosis without coma
- E11.11 Type 2 diabetes mellitus with ketoacidosis with coma
- E11.2 Type 2 diabetes mellitus with kidney complications
- E11.21 Type 2 diabetes mellitus with diabetic nephropathy

E11.22 Type 2 diabetes mellitus with diabetic chronic kidney disease

E11.29 Type 2 diabetes mellitus with other diabetic kidney complication

E11.3 Type 2 diabetes mellitus with ophthalmic complications

E11.31 Type 2 diabetes mellitus with unspecified diabetic retinopathy

E11.311 Type 2 diabetes mellitus with unspecified diabetic retinopathy with macular edema

E11.319 Type 2 diabetes mellitus with unspecified diabetic retinopathy without macular edema

E11.32 Type 2 diabetes mellitus with mild nonproliferative diabetic retinopathy

E11.321 Type 2 diabetes mellitus with mild nonproliferative diabetic retinopathy with macular edema

E11.321  
1 Type 2 diabetes mellitus with mild nonproliferative diabetic retinopathy with macular edema, right eye

E11.321  
2 Type 2 diabetes mellitus with mild nonproliferative diabetic retinopathy with macular edema, left eye

E11.321  
3 Type 2 diabetes mellitus with mild nonproliferative diabetic retinopathy with macular edema, bilateral

E11.321  
9 Type 2 diabetes mellitus with mild nonproliferative diabetic retinopathy with macular edema, unspecified eye

E11.329 Type 2 diabetes mellitus with mild nonproliferative diabetic retinopathy without macular edema

E11.329  
1 Type 2 diabetes mellitus with mild nonproliferative diabetic retinopathy without macular edema, right eye

E11.329  
2 Type 2 diabetes mellitus with mild nonproliferative diabetic retinopathy without macular edema, left eye

E11.329  
3 Type 2 diabetes mellitus with mild nonproliferative diabetic retinopathy without macular edema, bilateral

E11.329  
9 Type 2 diabetes mellitus with mild nonproliferative diabetic retinopathy without macular edema, unspecified eye

E11.33 Type 2 diabetes mellitus with moderate nonproliferative diabetic retinopathy

E11.331 Type 2 diabetes mellitus with moderate nonproliferative diabetic retinopathy with macular edema

E11.331  
1 Type 2 diabetes mellitus with moderate nonproliferative diabetic retinopathy with macular edema, right eye

E11.331  
2 Type 2 diabetes mellitus with moderate nonproliferative diabetic retinopathy with macular edema, left eye

E11.331  
3 Type 2 diabetes mellitus with moderate nonproliferative diabetic retinopathy with macular edema, bilateral

E11.331  
9 Type 2 diabetes mellitus with moderate nonproliferative diabetic retinopathy with macular edema, unspecified eye

E11.339 Type 2 diabetes mellitus with moderate nonproliferative diabetic retinopathy without macular edema

E11.339  
1 Type 2 diabetes mellitus with moderate nonproliferative diabetic retinopathy without macular edema, right eye

E11.339  
2 Type 2 diabetes mellitus with moderate nonproliferative diabetic retinopathy without macular edema, left eye

E11.339  
3 Type 2 diabetes mellitus with moderate nonproliferative diabetic retinopathy without macular edema, bilateral

E11.339  
9 Type 2 diabetes mellitus with moderate nonproliferative diabetic retinopathy without macular edema, unspecified eye

E11.34 Type 2 diabetes mellitus with severe nonproliferative diabetic retinopathy

E11.341 Type 2 diabetes mellitus with severe nonproliferative diabetic retinopathy with macular edema

E11.341  
1 Type 2 diabetes mellitus with severe nonproliferative diabetic retinopathy with macular edema, right eye

E11.341  
2 Type 2 diabetes mellitus with severe nonproliferative diabetic retinopathy with macular edema, left eye



E11.341  
3 Type 2 diabetes mellitus with severe nonproliferative diabetic retinopathy with macular edema, bilateral

E11.341  
9 Type 2 diabetes mellitus with severe nonproliferative diabetic retinopathy with macular edema, unspecified eye

E11.349  
1 Type 2 diabetes mellitus with severe nonproliferative diabetic retinopathy without macular edema, right eye

E11.349  
2 Type 2 diabetes mellitus with severe nonproliferative diabetic retinopathy without macular edema, left eye

E11.349  
3 Type 2 diabetes mellitus with severe nonproliferative diabetic retinopathy without macular edema, bilateral

E11.349  
9 Type 2 diabetes mellitus with severe nonproliferative diabetic retinopathy without macular edema, unspecified eye

E11.35  
1 Type 2 diabetes mellitus with proliferative diabetic retinopathy

E11.351  
1 Type 2 diabetes mellitus with proliferative diabetic retinopathy with macular edema, right eye

E11.351  
2 Type 2 diabetes mellitus with proliferative diabetic retinopathy with macular edema, left eye

E11.351  
3 Type 2 diabetes mellitus with proliferative diabetic retinopathy with macular edema, bilateral

E11.351  
9 Type 2 diabetes mellitus with proliferative diabetic retinopathy with macular edema, unspecified eye

E11.352  
1 Type 2 diabetes mellitus with proliferative diabetic retinopathy with traction retinal detachment involving the macula, right eye

E11.352  
2 Type 2 diabetes mellitus with proliferative diabetic retinopathy with traction retinal detachment involving the macula, left eye

E11.352  
3 Type 2 diabetes mellitus with proliferative diabetic retinopathy with traction retinal detachment involving the macula, bilateral

E11.352  
9 Type 2 diabetes mellitus with proliferative diabetic retinopathy with traction retinal detachment involving the macula, unspecified eye

E11.353  
1 Type 2 diabetes mellitus with proliferative diabetic retinopathy with traction retinal detachment not involving the macula, right eye

E11.353  
2 Type 2 diabetes mellitus with proliferative diabetic retinopathy with traction retinal detachment not involving the macula, left eye

E11.353  
3 Type 2 diabetes mellitus with proliferative diabetic retinopathy with traction retinal detachment not involving the macula, bilateral

E11.353  
9 Type 2 diabetes mellitus with proliferative diabetic retinopathy with traction retinal detachment not involving the macula, unspecified eye

E11.354  
1 Type 2 diabetes mellitus with proliferative diabetic retinopathy with combined traction retinal detachment and rhegmatogenous retinal detachment, right eye

E11.354  
2 Type 2 diabetes mellitus with proliferative diabetic retinopathy with combined traction retinal detachment and rhegmatogenous retinal detachment, left eye

E11.354  
3 Type 2 diabetes mellitus with proliferative diabetic retinopathy with combined traction retinal detachment and rhegmatogenous retinal detachment, bilateral

E11.354 9 Type 2 diabetes mellitus with proliferative diabetic retinopathy with combined traction retinal detachment and rhegmatogenous retinal detachment, unspecified eye

E11.355 Type 2 diabetes mellitus with stable proliferative diabetic retinopathy

E11.355 1 Type 2 diabetes mellitus with stable proliferative diabetic retinopathy, right eye

E11.355 2 Type 2 diabetes mellitus with stable proliferative diabetic retinopathy, left eye

E11.355 3 Type 2 diabetes mellitus with stable proliferative diabetic retinopathy, bilateral

E11.355 9 Type 2 diabetes mellitus with stable proliferative diabetic retinopathy, unspecified eye

E11.359 Type 2 diabetes mellitus with proliferative diabetic retinopathy without macular edema

E11.359 1 Type 2 diabetes mellitus with proliferative diabetic retinopathy without macular edema, right eye

E11.359 2 Type 2 diabetes mellitus with proliferative diabetic retinopathy without macular edema, left eye

E11.359 3 Type 2 diabetes mellitus with proliferative diabetic retinopathy without macular edema, bilateral

E11.359 9 Type 2 diabetes mellitus with proliferative diabetic retinopathy without macular edema, unspecified eye

E11.36 Type 2 diabetes mellitus with diabetic cataract

E11.37 Type 2 diabetes mellitus with diabetic macular edema, resolved following treatment

E11.37X 1 Type 2 diabetes mellitus with diabetic macular edema, resolved following treatment, right eye

E11.37X 2 Type 2 diabetes mellitus with diabetic macular edema, resolved following treatment, left eye

E11.37X 3 Type 2 diabetes mellitus with diabetic macular edema, resolved following treatment, bilateral

E11.37X 9 Type 2 diabetes mellitus with diabetic macular edema, resolved following treatment, unspecified eye

E11.39 Type 2 diabetes mellitus with other diabetic ophthalmic complication

E11.4 Type 2 diabetes mellitus with neurological complications

E11.40 Type 2 diabetes mellitus with diabetic neuropathy, unspecified

E11.41 Type 2 diabetes mellitus with diabetic mononeuropathy

E11.42 Type 2 diabetes mellitus with diabetic polyneuropathy

E11.43 Type 2 diabetes mellitus with diabetic autonomic (poly)neuropathy

E11.44 Type 2 diabetes mellitus with diabetic amyotrophy

E11.49 Type 2 diabetes mellitus with other diabetic neurological complication

E11.5 Type 2 diabetes mellitus with circulatory complications

E11.51 Type 2 diabetes mellitus with diabetic peripheral angiopathy without gangrene

E11.52 Type 2 diabetes mellitus with diabetic peripheral angiopathy with gangrene

E11.59 Type 2 diabetes mellitus with other circulatory complications

E11.6 Type 2 diabetes mellitus with other specified complications

E11.61 Type 2 diabetes mellitus with diabetic arthropathy

E11.610 Type 2 diabetes mellitus with diabetic neuropathic arthropathy

E11.618 Type 2 diabetes mellitus with other diabetic arthropathy

E11.62 Type 2 diabetes mellitus with skin complications

E11.620 Type 2 diabetes mellitus with diabetic dermatitis

E11.621 Type 2 diabetes mellitus with foot ulcer

- E11.622 Type 2 diabetes mellitus with other skin ulcer
- E11.628 Type 2 diabetes mellitus with other skin complications
- E11.63 Type 2 diabetes mellitus with oral complications
- E11.630 Type 2 diabetes mellitus with periodontal disease
- E11.638 Type 2 diabetes mellitus with other oral complications
- E11.64 Type 2 diabetes mellitus with hypoglycemia
- E11.640 Type 2 diabetes mellitus with hypoglycemia without coma
- E11.641 Type 2 diabetes mellitus with hypoglycemia with coma
- E11.649 Type 2 diabetes mellitus with hypoglycemia without coma
- E11.65 Type 2 diabetes mellitus with hyperglycemia
- E11.69 Type 2 diabetes mellitus with other specified complication
- E11.8 Type 2 diabetes mellitus with unspecified complications
- E11.9 Type 2 diabetes mellitus without complications
- E13 Other specified diabetes mellitus
- E13.0 Other specified diabetes mellitus with hyperosmolarity  
Other specified diabetes mellitus with hyperosmolarity without nonketotic hyperglycemic-hyperosmolar coma (NKHHC)
- E13.00
- E13.01 Other specified diabetes mellitus with hyperosmolarity with coma
- E13.1 Other specified diabetes mellitus with ketoacidosis
- E13.10 Other specified diabetes mellitus with ketoacidosis without coma
- E13.11 Other specified diabetes mellitus with ketoacidosis with coma
- E13.2 Other specified diabetes mellitus with kidney complications
- E13.21 Other specified diabetes mellitus with diabetic nephropathy
- E13.22 Other specified diabetes mellitus with diabetic chronic kidney disease
- E13.29 Other specified diabetes mellitus with other diabetic kidney complication
- E13.3 Other specified diabetes mellitus with ophthalmic complications
- E13.31 Other specified diabetes mellitus with unspecified diabetic retinopathy
- E13.311 Other specified diabetes mellitus with unspecified diabetic retinopathy with macular edema
- E13.319 Other specified diabetes mellitus with unspecified diabetic retinopathy without macular edema
- E13.32 Other specified diabetes mellitus with mild nonproliferative diabetic retinopathy
- E13.321 Other specified diabetes mellitus with mild nonproliferative diabetic retinopathy with macular edema
- E13.321 1 Other specified diabetes mellitus with mild nonproliferative diabetic retinopathy with macular edema, right eye
- E13.321 2 Other specified diabetes mellitus with mild nonproliferative diabetic retinopathy with macular edema, left eye
- E13.321 3 Other specified diabetes mellitus with mild nonproliferative diabetic retinopathy with macular edema, bilateral
- E13.321 9 Other specified diabetes mellitus with mild nonproliferative diabetic retinopathy with macular edema, unspecified eye
- E13.329 Other specified diabetes mellitus with mild nonproliferative diabetic retinopathy without macular edema
- E13.329 1 Other specified diabetes mellitus with mild nonproliferative diabetic retinopathy without macular edema, right eye
- E13.329 2 Other specified diabetes mellitus with mild nonproliferative diabetic retinopathy without macular edema, left eye
- E13.329 3 Other specified diabetes mellitus with mild nonproliferative diabetic retinopathy without macular edema, bilateral
- E13.329 9 Other specified diabetes mellitus with mild nonproliferative diabetic retinopathy without macular edema, unspecified eye

- E13.33 Other specified diabetes mellitus with moderate nonproliferative diabetic retinopathy
- E13.331 Other specified diabetes mellitus with moderate nonproliferative diabetic retinopathy with macular edema
- E13.331 1 Other specified diabetes mellitus with moderate nonproliferative diabetic retinopathy with macular edema, right eye
- E13.331 2 Other specified diabetes mellitus with moderate nonproliferative diabetic retinopathy with macular edema, left eye
- E13.331 3 Other specified diabetes mellitus with moderate nonproliferative diabetic retinopathy with macular edema, bilateral
- E13.331 9 Other specified diabetes mellitus with moderate nonproliferative diabetic retinopathy with macular edema, unspecified eye
- E13.339 Other specified diabetes mellitus with moderate nonproliferative diabetic retinopathy without macular edema
- E13.339 1 Other specified diabetes mellitus with moderate nonproliferative diabetic retinopathy without macular edema, right eye
- E13.339 2 Other specified diabetes mellitus with moderate nonproliferative diabetic retinopathy without macular edema, left eye
- E13.339 3 Other specified diabetes mellitus with moderate nonproliferative diabetic retinopathy without macular edema, bilateral
- E13.339 9 Other specified diabetes mellitus with moderate nonproliferative diabetic retinopathy without macular edema, unspecified eye
- E13.34 Other specified diabetes mellitus with severe nonproliferative diabetic retinopathy
- E13.341 Other specified diabetes mellitus with severe nonproliferative diabetic retinopathy with macular edema
- E13.341 1 Other specified diabetes mellitus with severe nonproliferative diabetic retinopathy with macular edema, right eye
- E13.341 2 Other specified diabetes mellitus with severe nonproliferative diabetic retinopathy with macular edema, left eye
- E13.341 3 Other specified diabetes mellitus with severe nonproliferative diabetic retinopathy with macular edema, bilateral
- E13.341 9 Other specified diabetes mellitus with severe nonproliferative diabetic retinopathy with macular edema, unspecified eye
- E13.349 Other specified diabetes mellitus with severe nonproliferative diabetic retinopathy without macular edema
- E13.349 1 Other specified diabetes mellitus with severe nonproliferative diabetic retinopathy without macular edema, right eye
- E13.349 2 Other specified diabetes mellitus with severe nonproliferative diabetic retinopathy without macular edema, left eye
- E13.349 3 Other specified diabetes mellitus with severe nonproliferative diabetic retinopathy without macular edema, bilateral
- E13.349 9 Other specified diabetes mellitus with severe nonproliferative diabetic retinopathy without macular edema, unspecified eye
- E13.35 Other specified diabetes mellitus with proliferative diabetic retinopathy
- E13.351 Other specified diabetes mellitus with proliferative diabetic retinopathy with macular edema
- E13.351 1 Other specified diabetes mellitus with proliferative diabetic retinopathy with macular edema, right eye
- E13.351 2 Other specified diabetes mellitus with proliferative diabetic retinopathy with macular edema, left eye
- E13.351 3 Other specified diabetes mellitus with proliferative diabetic retinopathy with macular edema, bilateral
- E13.351 9 Other specified diabetes mellitus with proliferative diabetic retinopathy with macular edema, unspecified eye

- E13.352 Other specified diabetes mellitus with proliferative diabetic retinopathy with traction retinal detachment involving the macula
- E13.352 1 Other specified diabetes mellitus with proliferative diabetic retinopathy with traction retinal detachment involving the macula, right eye
- E13.352 2 Other specified diabetes mellitus with proliferative diabetic retinopathy with traction retinal detachment involving the macula, left eye
- E13.352 3 Other specified diabetes mellitus with proliferative diabetic retinopathy with traction retinal detachment involving the macula, bilateral
- E13.352 9 Other specified diabetes mellitus with proliferative diabetic retinopathy with traction retinal detachment involving the macula, unspecified eye
- E13.353 Other specified diabetes mellitus with proliferative diabetic retinopathy with traction retinal detachment not involving the macula
- E13.353 1 Other specified diabetes mellitus with proliferative diabetic retinopathy with traction retinal detachment not involving the macula, right eye
- E13.353 2 Other specified diabetes mellitus with proliferative diabetic retinopathy with traction retinal detachment not involving the macula, left eye
- E13.353 3 Other specified diabetes mellitus with proliferative diabetic retinopathy with traction retinal detachment not involving the macula, bilateral
- E13.353 9 Other specified diabetes mellitus with proliferative diabetic retinopathy with traction retinal detachment not involving the macula, unspecified eye
- E13.354 Other specified diabetes mellitus with proliferative diabetic retinopathy with combined traction retinal detachment and rhegmatogenous retinal detachment
- E13.354 1 Other specified diabetes mellitus with proliferative diabetic retinopathy with combined traction retinal detachment and rhegmatogenous retinal detachment, right eye
- E13.354 2 Other specified diabetes mellitus with proliferative diabetic retinopathy with combined traction retinal detachment and rhegmatogenous retinal detachment, left eye
- E13.354 3 Other specified diabetes mellitus with proliferative diabetic retinopathy with combined traction retinal detachment and rhegmatogenous retinal detachment, bilateral
- E13.354 9 Other specified diabetes mellitus with proliferative diabetic retinopathy with combined traction retinal detachment and rhegmatogenous retinal detachment, unspecified eye
- E13.355 Other specified diabetes mellitus with stable proliferative diabetic retinopathy
- E13.355 1 Other specified diabetes mellitus with stable proliferative diabetic retinopathy, right eye
- E13.355 2 Other specified diabetes mellitus with stable proliferative diabetic retinopathy, left eye
- E13.355 3 Other specified diabetes mellitus with stable proliferative diabetic retinopathy, bilateral
- E13.355 9 Other specified diabetes mellitus with stable proliferative diabetic retinopathy, unspecified eye
- E13.359 Other specified diabetes mellitus with proliferative diabetic retinopathy without macular edema
- E13.359 1 Other specified diabetes mellitus with proliferative diabetic retinopathy without macular edema, right eye
- E13.359 2 Other specified diabetes mellitus with proliferative diabetic retinopathy without macular edema, left eye
- E13.359 3 Other specified diabetes mellitus with proliferative diabetic retinopathy without macular edema, bilateral
- E13.359 9 Other specified diabetes mellitus with proliferative diabetic retinopathy without macular edema, unspecified eye
- E13.36 Other specified diabetes mellitus with diabetic cataract
- E13.37 Other specified diabetes mellitus with diabetic macular edema, resolved following treatment
- E13.37X 1 Other specified diabetes mellitus with diabetic macular edema, resolved following treatment, right eye

E13.37X  
2 Other specified diabetes mellitus with diabetic macular edema, resolved following treatment, left eye

E13.37X  
3 Other specified diabetes mellitus with diabetic macular edema, resolved following treatment, bilateral

E13.37X  
9 Other specified diabetes mellitus with diabetic macular edema, resolved following treatment, unspecified eye

E13.39 Other specified diabetes mellitus with other diabetic ophthalmic complication

E13.4 Other specified diabetes mellitus with neurological complications

E13.40 Other specified diabetes mellitus with diabetic neuropathy, unspecified

E13.41 Other specified diabetes mellitus with diabetic mononeuropathy

E13.42 Other specified diabetes mellitus with diabetic polyneuropathy

E13.43 Other specified diabetes mellitus with diabetic autonomic (poly)neuropathy

E13.44 Other specified diabetes mellitus with diabetic amyotrophy

E13.49 Other specified diabetes mellitus with other diabetic neurological complication

E13.5 Other specified diabetes mellitus with circulatory complications

E13.51 Other specified diabetes mellitus with diabetic peripheral angiopathy without gangrene

E13.52 Other specified diabetes mellitus with diabetic peripheral angiopathy with gangrene

E13.59 Other specified diabetes mellitus with other circulatory complications

E13.6 Other specified diabetes mellitus with other specified complications

E13.61 Other specified diabetes mellitus with diabetic arthropathy

E13.610 Other specified diabetes mellitus with diabetic neuropathic arthropathy

E13.618 Other specified diabetes mellitus with other diabetic arthropathy

E13.62 Other specified diabetes mellitus with skin complications

E13.620 Other specified diabetes mellitus with diabetic dermatitis

E13.621 Other specified diabetes mellitus with foot ulcer

E13.622 Other specified diabetes mellitus with other skin ulcer

E13.628 Other specified diabetes mellitus with other skin complications

E13.63 Other specified diabetes mellitus with oral complications

E13.630 Other specified diabetes mellitus with periodontal disease

E13.638 Other specified diabetes mellitus with other oral complications

E13.64 Other specified diabetes mellitus with hypoglycemia

E13.640 Other specified diabetes mellitus with hypoglycemia without coma

E13.641 Other specified diabetes mellitus with hypoglycemia with coma

E13.649 Other specified diabetes mellitus with hypoglycemia without coma

E13.65 Other specified diabetes mellitus with hyperglycemia

E13.69 Other specified diabetes mellitus with other specified complication

E13.8 Other specified diabetes mellitus with unspecified complications

E13.9 Other specified diabetes mellitus without complications

N25.1 Nephrogenic diabetes insipidus

O24 Diabetes mellitus in pregnancy, childbirth, and the puerperium

O24.1 Pre-existing type 2 diabetes mellitus, in pregnancy, childbirth and the puerperium

O24.11 Pre-existing type 2 diabetes mellitus, in pregnancy

O24.111 Pre-existing type 2 diabetes mellitus, in pregnancy, first trimester

O24.112 Pre-existing type 2 diabetes mellitus, in pregnancy, second trimester

O24.113 Pre-existing type 2 diabetes mellitus, in pregnancy, third trimester

O24.119 Pre-existing type 2 diabetes mellitus, in pregnancy, unspecified trimester

O24.12 Pre-existing type 2 diabetes mellitus, in childbirth

|         |                                                                                        |
|---------|----------------------------------------------------------------------------------------|
| O24.13  | Pre-existing type 2 diabetes mellitus, in the puerperium                               |
| O24.3   | Unspecified pre-existing diabetes mellitus in pregnancy, childbirth and the puerperium |
| O24.31  | Unspecified pre-existing diabetes mellitus in pregnancy                                |
| O24.311 | Unspecified pre-existing diabetes mellitus in pregnancy, first trimester               |
| O24.312 | Unspecified pre-existing diabetes mellitus in pregnancy, second trimester              |
| O24.313 | Unspecified pre-existing diabetes mellitus in pregnancy, third trimester               |
| O24.319 | Unspecified pre-existing diabetes mellitus in pregnancy, unspecified trimester         |
| O24.32  | Unspecified pre-existing diabetes mellitus in childbirth                               |
| O24.33  | Unspecified pre-existing diabetes mellitus in the puerperium                           |
| R73.03  | Prediabetes                                                                            |
| Z13.1   | Encounter for screening for diabetes mellitus                                          |
| Z83.3   | Family history of diabetes mellitus                                                    |
| Z86.32  | Personal history of gestational diabetes                                               |

**eTable 1i- Hypertension ICD 9/10 codes**

| ICD 9/10 | CONCEPT_NAME                       |
|----------|------------------------------------|
| 401      | essential hypertension             |
| 401.1    | benign hypertension                |
| 401.9    | unspecified essential hypertension |

**eTable 1j- Hepatic encephalopathy ICD 9/10 codes**

| ICD 9/10 | CONCEPT_NAME                                            |
|----------|---------------------------------------------------------|
| 572.2    | Hepatic encephalopathy                                  |
| B16.2    | Acute hepatitis B without delta-agent with hepatic coma |
| B17.11   | Acute hepatitis C with hepatic coma                     |
| B19.0    | Unspecified viral hepatitis with hepatic coma           |
| B19.11   | Unspecified viral hepatitis B with hepatic coma         |
| B19.21   | Unspecified viral hepatitis C with hepatic coma         |
| K70.41   | Alcoholic hepatic failure with coma                     |
| K72.11   | Chronic hepatic failure with coma                       |
| K72.91   | Hepatic failure, unspecified with coma                  |

**eTable 1k- Hepatorenal syndrome ICD 9/10 codes**

| ICD 9/10 | CONCEPT_NAME         |
|----------|----------------------|
| 572.4    | Hepatorenal syndrome |

**eTable 1l- Ascites ICD 9/10 codes**

| ICD 9/10 | CONCEPT_NAME                              |
|----------|-------------------------------------------|
| 789.5    | Ascites                                   |
| 789.59   | Other ascites                             |
| K65.2    | Spontaneous bacterial peritonitis         |
| K70.11   | Alcoholic hepatitis with ascites          |
| K70.31   | Alcoholic cirrhosis of liver with ascites |

R18.8 Other ascites

**eTable 1m- Spontaneous bacterial peritonitis ICD 9/10 codes**

**ICD 9/10 CONCEPT\_NAME**

567.23 spontaneous bacterial peritonitis  
K65.2 spontaneous bacterial peritonitis

**eTable 1n- Bleeding esophageal and gastric varices ICD 9/10 codes**

**ICD 9/10 CONCEPT\_NAME**

456, 456.2 Esophageal varices with bleeding  
I85.01 Esophageal varices with bleeding  
I86.41 Gastric varices with bleeding  
I85.11 Secondary esophageal varices with bleeding

**eTable 1o- Liver transplantation ICD 9/10 codes**

**ICD 9/10 CONCEPT\_NAME**

V42.7 Liver transplant status  
Z94.4 Liver transplant status



**eTable 2- Human immunodeficiency virus (HIV), hepatitis C, hepatitis B, AST, ALT and platelet LOINCs**

| <b>Test</b>                                                            | <b>LOINC</b> |
|------------------------------------------------------------------------|--------------|
| HIV 1 Ab + HIV 2 Ab                                                    | 56888-1      |
| HIV 1 RNA                                                              | 62469-2      |
| HIV RNA                                                                | 20447-9      |
| HIV RNA                                                                | 29541-0      |
| HIV RNA                                                                | 62469-2      |
| HIV RNA                                                                | 25835-0      |
| HIV 1 + 2 Ab                                                           | 31201-7      |
| HIV 1 + HIV 2 Ab & HIV 1 p24Ag                                         | 75666-8      |
| HIV 1 Ab + HIV 2 Ab                                                    | 80387-4      |
| HIV 1 Ab                                                               | 29893-5      |
| HIV 1 Ab & HIV 2 Ab                                                    | 80203-3      |
| HIV 1 Ab & HIV 2 Ab                                                    | 68961-2      |
|                                                                        | 86233-4      |
| HIV 1 Ab & HIV 2 Ab                                                    | 69668-2      |
| HIV 1 Ab                                                               | 5221-7       |
| HIV 1 (presence)                                                       | 32571-2      |
| Anti-HIV 1 + Anti-HIV 2                                                | 49580-4      |
| HIV 1 Ab + HIV 2 Ab                                                    | 31201-7      |
| HIV 1 Ab + HIV 2 Ab                                                    | 80387-4      |
| Hepatitis C virus RNA                                                  | 3014759      |
| Hepatitis C virus RNA                                                  | 3016770      |
| Hepatitis C virus RNA                                                  | 3018447      |
| Hepatitis C virus RNA                                                  | 3021125      |
| Hepatitis C virus RNA                                                  | 3024429      |
| Hepatitis C virus RNA                                                  | 3033192      |
| Hepatitis C virus RNA                                                  | 3052023      |
| Hepatitis B virus surface Ag in serum or plasma by immunoassay         | 3019510      |
| Hepatitis B virus surface Ag in serum or plasma by neutralization test | 3025267      |
| AST                                                                    | 545004-4     |
| AST                                                                    | 1916-6       |
| AST                                                                    | 16325-3      |
| AST                                                                    | 27344-1      |
| AST                                                                    | 1920-8       |
| AST                                                                    | 2325-9       |
| AST                                                                    | 44786-2      |
| AST                                                                    | 30239-8      |
| AST                                                                    | 88112-8      |
| AST                                                                    | 100739-2     |
| AST                                                                    | 48136-6      |
| ALT                                                                    | 77144-4      |
| ALT                                                                    | 16325-3      |
| ALT                                                                    | 1916-6       |
| ALT                                                                    | 1742-6       |
| ALT                                                                    | 100738-4     |

|                                       |         |
|---------------------------------------|---------|
| ALT                                   | 48134-1 |
| ALT                                   | 1743-4  |
| ALT                                   | 1744-2  |
| ALT                                   | 44785-4 |
| Platelets.reticulated/100 platelets   | 51633-6 |
| Platelets.reticulated/100 platelets   | 71693-6 |
| Platelets.large/Platelets             | 97994-8 |
| Platelets.large/Platelets             | 48386-7 |
| Platelets.reticulated/platelets.total | 70032-8 |
| Platelets.agranular                   | 33216-3 |
| Platelets.reticulated                 | 51632-8 |
| Platelets.large fragments             | 15201-7 |
| Platelets.giant                       | 5908-9  |
| Platelets.large                       | 32146-3 |
| Platelets.small                       | 32208-1 |
| Bizarre platelets                     | 60455-3 |
| Platelets.large                       | 34167-7 |
| Platelets.reticulated                 | 71692-8 |
| Platelets                             | 12243-2 |
| Platelets.large                       | 96354-6 |
| Platelets                             | 26515-7 |
| Platelets                             | 26516-5 |
| Platelets                             | 79427-1 |
| Platelets                             | 49497-1 |
| Platelets                             | 778-1   |
| Platelets                             | 5907-1  |
| Platelets                             | 777-3   |
| Platelets                             | 13056-7 |
| Platelets                             | 74775-8 |
| Platelets                             | 97995-5 |
| Platelets                             | 74464-9 |
| Platelets.giant/100 leukocytes        | 32712-2 |
| Platelets                             | 9317-9  |
| Platelet genotype                     | 34977-9 |
| Platelet distribution width           | 51631-0 |
| Platelet morphology finding           | 11125-2 |
| Platelet mass                         | 55206-7 |
| Platelet mean volume                  | 28542-9 |
| Platelet anisocytosis                 | 51640-1 |
| Platelet clump                        | 7796-6  |
| Platelet mean diameter                | 30459-2 |
| Platelet clump                        | 40741-1 |
| Platelet component distribution width | 76137-9 |
| Platelet mean diameter                | 775-7   |
| Platelet mean volume                  | 776-5   |
| Platelet satellitism                  | 18312-9 |
| Mean platelet component               | 76683-2 |

|                                      |         |
|--------------------------------------|---------|
| Platelet distribution width          | 32207-3 |
| Platelet dry mass distribution width | 76685-7 |
| Mean platelet dry mass               | 76684-0 |
| Platelet dense bodies                | 79768-8 |
| Platelet mean volume                 | 32623-1 |
| Platelet mean volume                 | 32711-4 |

**eTable 3- ICD 9 codes for other gastrointestinal malignancies**

| Site                                     | ICD9  | Description                                                                                                                                                                                                |
|------------------------------------------|-------|------------------------------------------------------------------------------------------------------------------------------------------------------------------------------------------------------------|
| <b>Colon</b>                             | 153   | Malignant neoplasm of colon                                                                                                                                                                                |
| Hepatic flexure                          | 153.0 |                                                                                                                                                                                                            |
| Transverse colon                         | 153.1 |                                                                                                                                                                                                            |
| Descending colon                         | 153.2 | Left colon                                                                                                                                                                                                 |
| Sigmoid colon                            | 153.3 | Sigmoid (flexure)                                                                                                                                                                                          |
| Cecum                                    | 153.4 | Ileocecal valve                                                                                                                                                                                            |
| Appendix                                 | 153.5 |                                                                                                                                                                                                            |
| Ascending colon                          | 153.6 | Right colon                                                                                                                                                                                                |
| Splenic flexure                          | 153.7 |                                                                                                                                                                                                            |
| Other specified sites of large intestine | 153.8 | Malignant neoplasm of contiguous or overlapping sites of colon whose point of origin cannot be determined                                                                                                  |
| Colon, unspecified                       | 153.9 | Large intestine NOS                                                                                                                                                                                        |
| <b>Rectum</b>                            | 154   | Malignant neoplasm of rectum, rectosigmoid junction, and anus                                                                                                                                              |
| Rectosigmoid junction                    | 154.0 | Colon with rectum/Rectosigmoid (colon)                                                                                                                                                                     |
| Rectum                                   | 154.1 | Rectal ampulla                                                                                                                                                                                             |
| Anal canal                               | 154.2 | Anal sphincter                                                                                                                                                                                             |
| Anus, unspecified                        | 154.3 |                                                                                                                                                                                                            |
| Other                                    | 154.8 | Anorectum/Cloacogenic zone/Malignant neoplasm of contiguous or overlapping sites of rectum, rectosigmoid junction, and anus whose point of origin cannot be determined                                     |
| <b>Stomach</b>                           | 151   | Malignant neoplasm of stomach                                                                                                                                                                              |
| Cardia                                   | 151.0 | Cardiac orifice/Cardio-esophageal junction                                                                                                                                                                 |
| Pylorus                                  | 151.0 | Prepylorus/Pyloric canal                                                                                                                                                                                   |
| Pyloric antrum                           | 151.2 | Antrum of stomach NOS                                                                                                                                                                                      |
| Fundus of stomach                        | 151.3 |                                                                                                                                                                                                            |
| Body of stomach                          | 151.4 |                                                                                                                                                                                                            |
| Lesser curvature, unspecified            | 151.5 | Lesser curvature, not classifiable to 151.1-151.4                                                                                                                                                          |
| Greater curvature, unspecified           | 151.6 | Greater curvature, not classifiable to 151.0-151.4                                                                                                                                                         |
| Other specified sites of stomach         | 151.8 | Anterior wall, not classifiable to 151.0-151.4/Posterior wall, not classifiable to 151.0-151.4/Malignant neoplasm of contiguous or overlapping sites of stomach whose point of origin cannot be determined |
| Stomach, unspecified                     | 151.9 | Carcinoma ventriculi/Gastric cancer                                                                                                                                                                        |
| <b>Pancreas</b>                          | 157   | Malignant neoplasm of pancreas                                                                                                                                                                             |
| Head of pancreas                         | 157.0 |                                                                                                                                                                                                            |
| Body of pancreas                         | 157.1 |                                                                                                                                                                                                            |
| Tail of pancreas                         | 157.2 |                                                                                                                                                                                                            |
| Pancreatic duct                          | 157.3 | Duct of: Santorini/Wirsung                                                                                                                                                                                 |
| Islets of Langerhans                     | 157.4 | Islets of Langerhans, any part of pancreas/Use additional code to identify any functional activity                                                                                                         |

|                                   |       |                                                                                                                                        |
|-----------------------------------|-------|----------------------------------------------------------------------------------------------------------------------------------------|
| Other specified sites of pancreas | 157.8 | Ectopic pancreatic tissue/Malignant neoplasm of contiguous or overlapping sites of pancreas whose point of origin cannot be determined |
| Pancreas, part unspecified        | 157.9 |                                                                                                                                        |

**eTable 4- Association between AO and other risk factors for HCC using APRI score to identify HCC cases.**

| Characteristic                                             | Non-cirrhosis (n = 263,148)   |                   | Cirrhosis (n = 33,355)        |                   |
|------------------------------------------------------------|-------------------------------|-------------------|-------------------------------|-------------------|
|                                                            | Multivariable<br>aHR (95% CI) | P-value           | Multivariable<br>aHR (95% CI) | P-value           |
| Agent Orange                                               | 1.001 (0.853-1.175)           | 0.9893            | 0.8142 (0.923-1.107)          | 0.8142            |
| Age (at deployment)                                        | 1.017 (0.997-1.037)           | 0.0937            | <b>0.971 (0.953-0.990)</b>    | <b>0.0030</b>     |
| Hispanic or Latino**                                       | 0.967 (0.697-1.343)           | 0.8423            | <b>1.503 (1.297-1.742)</b>    | <b>&lt;0.0001</b> |
| Non-Hispanic Black                                         | 1.132 (0.924-1.387)           | 0.2317            | <b>1.165 (1.040-1.304)</b>    | <b>0.0081</b>     |
| Smoking                                                    | 1.286 (0.975-1.698)           | 0.0753            | 1.086 (0.887-1.328)           | 0.4247            |
| Obesity                                                    | 1.004 (0.786-1.282)           | 0.9764            | 0.941 (0.812-1.090)           | 0.4150            |
| Viral hepatitis                                            | <b>2.459 (1.080-2.906)</b>    | <b>&lt;0.0001</b> | <b>3.715 (3.255-4.241)</b>    | <b>&lt;0.0001</b> |
| Alcohol liver disease                                      | 1.063 (0.906-1.249)           | 0.4530            | <b>1.319 (1.187-1.466)</b>    | <b>&lt;0.0001</b> |
| NASH/NAFLD <sup>#</sup>                                    | <b>2.418 (1.954-2.993)</b>    | <b>&lt;0.0001</b> | <b>1.898 (1.699-2.121)</b>    | <b>&lt;0.0001</b> |
| HIV                                                        | 1.103 (0.933-1.304)           | 0.2530            | 0.974 (0.888-1.067)           | 0.5707            |
| Autoimmune hepatitis <sup>###</sup>                        | 1.811 (0.978-3.352)           | 0.0588            | 1.121 (0.866-1.452)           | 0.3842            |
| Hemochromatosis                                            | <b>1.911 (1.174-3.110)</b>    | <b>0.0092</b>     | <b>1.306 (1.060-1.609)</b>    | <b>0.0122</b>     |
| Alpha-1-antri trypsin                                      | <b>1.658 (0.969-1.838)</b>    | <b>0.0652</b>     | 1.134 (0.944-1.363)           | 0.1792            |
| Secondary or unspecific biliary cirrhosis <sup>&amp;</sup> | -                             | -                 | 1.288 (0.906-1.831)           | 0.1587            |
| Dyslipidemia                                               | <b>0.477 (0.379-0.600)</b>    | <b>&lt;0.0001</b> | <b>0.455 (0.405-0.510)</b>    | <b>&lt;0.0001</b> |
| Hypertension                                               | <b>1.668 (1.270-2.190)</b>    | <b>0.0002</b>     | 1.163 (0.995-1.360)           | 0.0572            |
| Diabetes <sup>&amp;&amp;</sup>                             | <b>1.448 (1.085-1.933)</b>    | <b>0.0120</b>     | 1.076 (0.915-1.267)           | 0.3749            |
| Diabetes and Obesity interactions                          | 1.009 (0.715-1.424)           | 0.9591            | 0.956 (0.785-1.164)           | 0.6519            |

\*adjusting for age at deployment, race and ethnicity; \*\*White individuals used as reference group; <sup>#</sup>combined NAFLD and NASH in multivariable model; <sup>###</sup>combined HCV and HBV; <sup>&</sup>no cases in the non-cirrhosis group; <sup>&&</sup>obesity and diabetes interactions assessed which was not significant in multivariable model.

Abbreviations: aHR=adjusted hazard ratio; NAFLD=nonalcoholic fatty liver disease; NASH=nonalcoholic steatohepatitis; HIV=human immunodeficiency virus.

## **eMethods:**

### *AO exposure is not associated with incident HCC with age stratification*

To further explore the finding of age at deployment being inversely associated with incident HCC, we assessed the interactions between AO exposure and age. Independently of cirrhosis status, there was no significant association between AO exposure and age after adjusting for race and ethnicity. Similarly, early age (decade 20 in years) was not significantly associated with HCC in the cirrhosis (aHR = 1.00, 95% CI 0.92-1.09, p=0.99) and non-cirrhosis (aHR = 0.96, 95% CI 0.81-1.14, p=0.65) groups (**eTable 5**).

### *Association between smoking and alcohol with incident HCC*

In the non-cirrhosis group, age significantly interacted with smoking (aHR = 1.78, 95% CI 1.30-1.08, p=0.0473), after adjusting for AO exposure, race and ethnicity. After stratifying age into decades (20-60), we assessed the association of each decade with incident HCC. We found that young patients (decade = 20) had a significantly higher risk for incident HCC in both cirrhosis (aHR= 1.32, 95% CI 1.01-1.63, p=0.0078) and cirrhosis groups (aHR = 1.91, 95% CI 1.38-2.66, p=0.0001), compared to other decades (older decades of 30-60) (**eTable 6**)

No significant interactions were identified between age and alcohol, however after stratifying age by decade we found that young age was significantly associated with incident HCC. Veterans in their 20s (aHR = 2.05, 95% CI 1.84-2.28, p<0.0001) and 30s (aHR = 1.89, 95% CI 1.27-2.82, p=0.0016), compared to older Veterans (decades 40-60) (**eTable 7**).

eTable 5- Association between AO and other risk factors for HCC using inverse probability weighing

|                                                            | <b>Multivariable aHR (95% CI)</b> | <b>P-value</b>    |
|------------------------------------------------------------|-----------------------------------|-------------------|
| Agent Orange                                               | 0.899 (0.804-1.006)               | 0.0637            |
| <b>Cirrhosis</b>                                           | <b>6.106 (5.494-6.785)</b>        | <b>&lt;0.0001</b> |
| Age (at deployment)                                        | 0.989 (0.972-1.007)               | 0.2238            |
| Hispanic or Latino                                         | 1.194 (0.974-1.463)               | 0.0877            |
| Non-Hispanic Black                                         | 1.106 (0.961-1.273)               | 0.1592            |
| Smoking                                                    | 1.146 (0.901-1.457)               | 0.2663            |
| Obesity                                                    | 0.987 (0.829-1.176)               | 0.8873            |
| <b>Viral hepatitis</b>                                     | <b>3.203 (2.842-3.611)</b>        | <b>&lt;0.0001</b> |
| <b>Alcohol liver disease</b>                               | <b>1.286 (1.151-1.436)</b>        | <b>&lt;0.0001</b> |
| <b>NASH/NAFLD<sup>#</sup></b>                              | <b>2.291 (2.008-2.615)</b>        | <b>&lt;0.0001</b> |
| HIV                                                        | 0.977 (0.868-1.100)               | 0.7049            |
| Autoimmune hepatitis <sup>##</sup>                         | 1.024 (0.700-1.497)               | 0.9031            |
| <b>Hemochromatosis</b>                                     | <b>2.512 (1.924-3.280)</b>        | <b>&lt;0.0001</b> |
| Alpha-1-antitrypsin                                        | 1.298 (0.965-1.746)               | 0.0847            |
| Secondary or unspecific biliary cirrhosis <sup>&amp;</sup> | 0.780 (0.078-7.821)               | 0.8330            |
| <b>Dyslipidemia</b>                                        | <b>0.439 (0.370-0.521)</b>        | <b>&lt;0.0001</b> |
| <b>Hypertension</b>                                        | <b>1.337 (1.119-1.598)</b>        | <b>0.0014</b>     |
| <b>Diabetes<sup>&amp;&amp;</sup></b>                       | <b>1.250 (1.017-1.537)</b>        | <b>0.0343</b>     |
| Diabetes and Obesity interactions                          | 1.134 (0.888-1.449)               | 0.3139            |



eTable 6- Age (in years) stratification for AO exposure.

| Cirrhosis (n = 35,877) |       |             |         | Non-cirrhosis (n = 260,628) |       |             |         |
|------------------------|-------|-------------|---------|-----------------------------|-------|-------------|---------|
| Age by decade          | HR    | 95% CI      | P-value | Age by decade               | HR    | 95% CI      | P-value |
| age=20                 | 1.009 | 0.922-1.103 | 0.8532  | age=20                      | 0.979 | 0.825-1.162 | 0.8072  |
| age=30                 | 0.874 | 0.585-1.304 | 0.5086  | age=30                      | 0.818 | 0.554-1.210 | 0.3151  |
| age=40                 | 0.757 | 0.337-1.698 | 0.4989  | age=40                      | 0.684 | 0.306-1.531 | 0.3555  |
| age=50                 | 0.656 | 0.194-2.217 | 0.4969  | age=50                      | 0.572 | 0.167-1.959 | 0.3736  |
| age=60                 | 0.568 | 0.111-2.898 | 0.4961  | age=60                      | 0.478 | 0.091-2.514 | 0.3835  |

eTable 7- Age (in years) stratification for tobacco use.

| Cirrhosis (n = 35,877) |              |                    |               | Non-cirrhosis (n = 260,628) |              |                    |               |
|------------------------|--------------|--------------------|---------------|-----------------------------|--------------|--------------------|---------------|
| Age by decade          | HR           | 95% CI             | P-value       | Age by decade               | HR           | 95% CI             | P-value       |
| age=20                 | <b>1.324</b> | <b>1.077-1.627</b> | <b>0.0078</b> | age=20                      | <b>1.915</b> | <b>1.380-2.659</b> | <b>0.0001</b> |
| age=30                 | 0.869        | 0.460-1.643        | 0.6665        | age=30                      | 1.110        | 0.698-1.765        | 0.6589        |
| age=40                 | 0.571        | 0.154-2.120        | 0.4024        | age=40                      | 0.643        | 0.249-1.664        | 0.3629        |
| age=50                 | 0.375        | 0.051-2.763        | 0.3358        | age=50                      | 0.373        | 0.085-1.628        | 0.1895        |
| age=60                 | 0.246        | 0.017-3.610        | 0.3064        | age=60                      | 0.216        | 0.029-1.606        | 0.1343        |

eTable 8- Age (in years) stratification for alcohol use.

| Cirrhosis (n = 35,877) |              |                    |                  | Non-cirrhosis (n = 260,628) |               |                      |               |
|------------------------|--------------|--------------------|------------------|-----------------------------|---------------|----------------------|---------------|
| Age by decade          | HR           | 95% CI             | P-value          | Age by decade               | HR            | 95% CI               | P-value       |
| age=20                 | <b>2.048</b> | <b>1.843-2.276</b> | <b>&lt;.0001</b> | age=20                      | <b>1.2658</b> | <b>1.0701-1.4973</b> | <b>0.0059</b> |
| age=30                 | <b>1.894</b> | <b>1.272-2.819</b> | <b>0.0016</b>    | age=30                      | 0.9997        | 0.633-1.5789         | 0.9990        |
| age=40                 | 1.751        | 0.782-3.922        | 0.1730           | age=40                      | 0.7895        | 0.3098-2.0123        | 0.6206        |
| age=50                 | 1.620        | 0.479-5.480        | 0.4383           | age=50                      | 0.6235        | 0.1501-2.5898        | 0.5156        |
| age=60                 | 1.498        | 0.293-7.666        | 0.6279           | age=60                      | 0.4924        | 0.0726-3.3408        | 0.4683        |
